# Supplementary material
Source: PubMed Central journal article supplement (PMC8285055)
Supplement: NIHMS1718133-supplement-sm.pdf [file NIHMS1718133-supplement-sm.pdf]

## Supplementary Materials for

### **Oxytocin antagonism prevents pregnancy-associated aortic dissection in a mouse model of Marfan syndrome**

Jennifer Pardo Habashi, Elena Gallo MacFarlane, Rustam Bagirzadeh, Caitlin Bowen, Nicholas Huso, Yichun Chen, Djahida Bedja, Tyler J. Creamer, Graham Rykiel, Maurice Manning, David Huso, Harry C. Dietz\*

\*Corresponding author. Email: hdietz@jhmi.edu

Published 1 May 2019, *Sci. Transl. Med.* **11**, eaat4822 (2019)  
DOI: 10.1126/scitranslmed.aat4822

#### **This PDF file includes:**

- Fig. S1. Subcutaneous pump placement effect on survival.
- Fig. S2. Blood pressure effect in *Fbn1*<sup>mgR/mgR</sup> mice.
- Fig. S3. OR mRNA expression in the proximal ascending aorta.
- Fig. S4. Blood pressure effect in *Fbn1*<sup>mgR/mgR</sup> mice.
- Table S1. Average aortic root and ascending aortic growth over the 7-week period spanning pregnancy and lactation in untreated mice.
- Table S2. Average aortic root and ascending aortic growth over the 7-week period spanning pregnancy and lactation in treated mice.
- Table S3. Effect of OTA treatment on the average systolic and diastolic blood pressure.
- Table S4. Average OR expression in the aorta.
- Table S5. Effect of hydralazine or propranolol on the average systolic and diastolic blood pressure.
- Table S6. Average ERK1/2 phosphorylation in untreated mice.
- Table S7. Average ERK1/2 phosphorylation in treated mice.
- Table S8. Effect of trametinib on average systolic and diastolic blood pressure.
- Table S9. Average ERK1/2 phosphorylation in trametinib-treated mice.

## Supplementary Materials

### Supplementary Figures

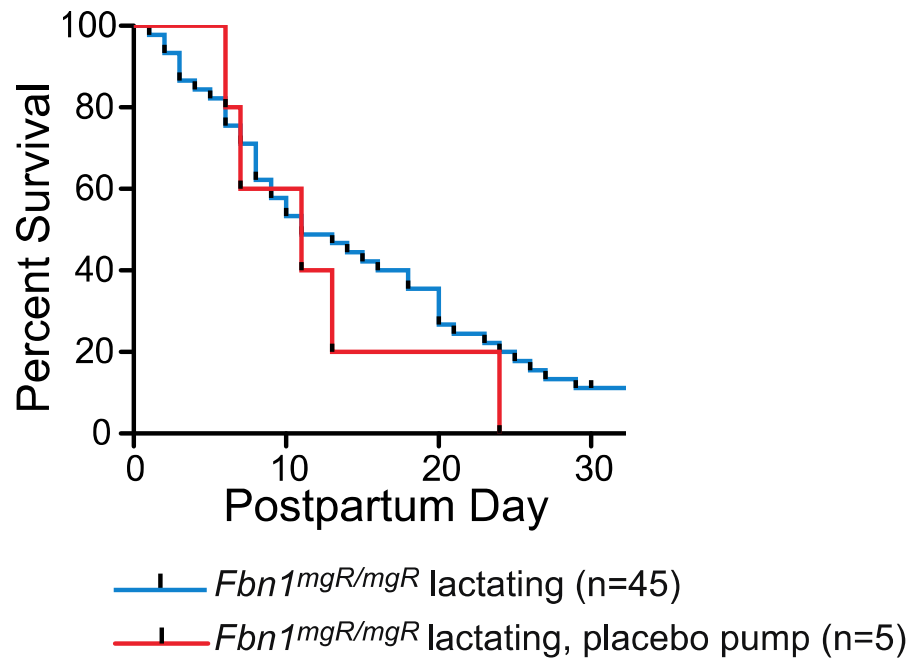

**Fig. S1. Subcutaneous pump placement effect on survival.** Kaplan-Meier curve demonstrating survival with (n=5) or without (n=45) implantation of subcutaneous mini osmotic pump in lactating *Fbn1<sup>mgR/mgR</sup>* mice. Survival was statistically evaluated using a log-rank (Mantel-Cox) test. All significant p values ( $p < 0.05$ ) noted on figure.

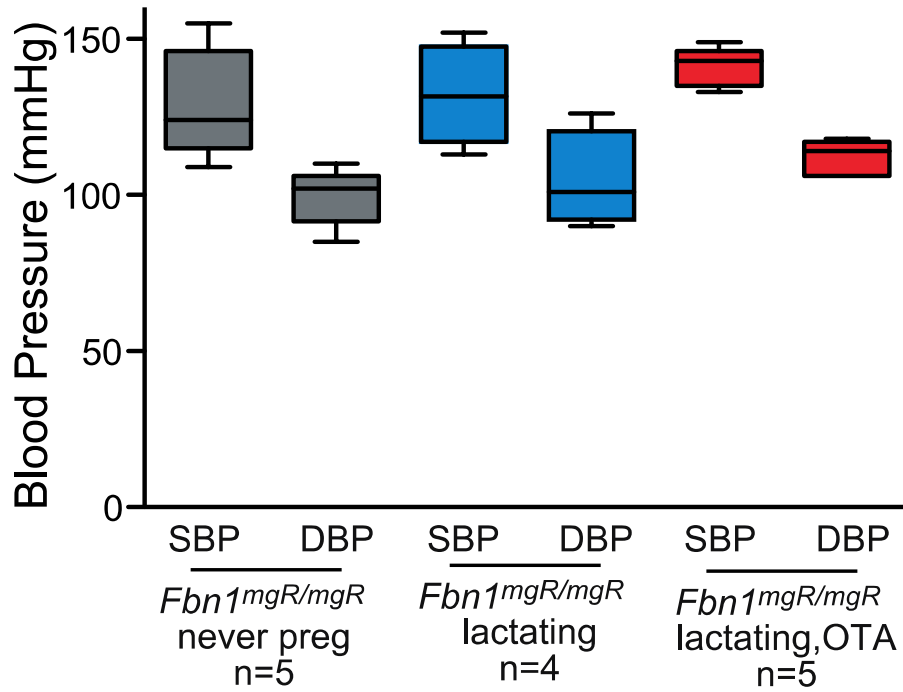

**Fig. S2. Blood pressure effect in *Fbn1*<sup>mgR/mgR</sup> mice.** Average DBP and SBP in never pregnant (n=5), lactating (n=4), or OTA treated (n=5) *Fbn1*<sup>mgR/mgR</sup> mice. The box extends from the 25<sup>th</sup> to 75<sup>th</sup> percentiles, median is denoted by the internal line, and whiskers indicate the range calculated using the Tukey method with data points outside the whiskers shown as individual points. All significant p values (p<0.05) noted on figure.

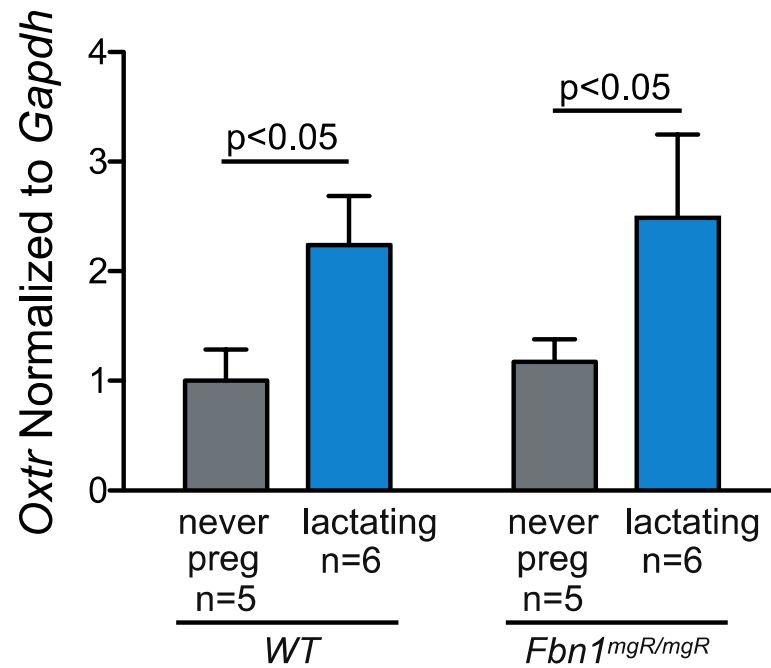

**Fig. S3. OR mRNA expression in the proximal ascending aorta.** Gene expression is shown for WT and *Fbn1<sup>mgR/mgR</sup>* never pregnant (n=5) and lactating (n=6) mice. Data shown as mean  $\pm$  SEM, p values determined by 2-way ANOVA.

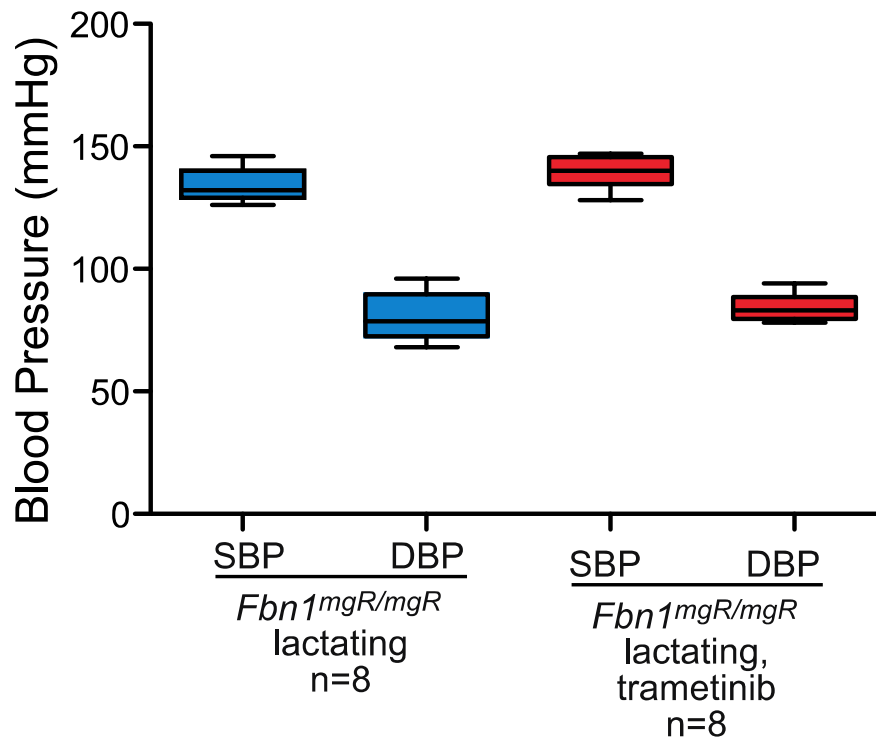

**Fig. S4. Blood pressure effect in *Fbn1*<sup>mgR/mgR</sup> mice.** Average DBP and SBP in lactating (n=8) or OTA-treated (n=8) *Fbn1*<sup>mgR/mgR</sup> mice. The box extends from the 25<sup>th</sup> to 75<sup>th</sup> percentiles, median is denoted by the internal line, and whiskers indicate the range calculated using the Tukey method with data points outside the whiskers shown as individual points. All significant p values (p<0.05) noted on figure.

Supplementary Tables

**Table S1. Average aortic root and ascending aortic growth over the 7-week period spanning pregnancy and lactation in untreated mice.**

| WT, never preg |          | WT, lact  |          | <i>Fbn1</i> mgR/mgR, never preg |          | <i>Fbn1</i> mgR/mgR, lact |          |
|----------------|----------|-----------|----------|---------------------------------|----------|---------------------------|----------|
| Root (mm)      | Asc (mm) | Root (mm) | Asc (mm) | Root (mm)                       | Asc (mm) | Root (mm)                 | Asc (mm) |
| 0.02           | 0.09     | 0.09      | 0.1      | 0.98                            | 0.69     | 0.67                      | 0.55     |
| 0.08           | 0.05     | 0.05      | 0.19     | 0.15                            | 0.05     | 2.34                      | 1.56     |
| 0.15           | 0.06     | 0.1       | 0.12     | 0.23                            | 0.17     | 0.15                      | 0.53     |
| 0.05           | -0.11    | 0.11      | 0.03     | 0.34                            | 0.78     | 0.17                      | 0.41     |
| -0.03          | 0.12     | 0.13      | 0.14     | 0.64                            | 0.62     | 0.41                      | 1.45     |
| -0.02          | -0.13    | 0.11      | 0.05     | 0.31                            | 0.56     | 0.44                      | 0.73     |
| 0.07           | 0.17     | 0.09      | 0.13     | 0.19                            | 0.49     | 0.46                      | 2.2      |
| 0.06           | 0.03     | 0.23      | 0.19     | 0.07                            | 0.96     | 0.33                      | 0.88     |
| 0.11           | 0.12     | 0.22      | 0.15     | 0.1                             | 0.78     | 0.12                      | 0.64     |
| 0.05           | 0.12     | 0.21      | 0.22     | 0.68                            | 0.76     | 0.09                      | 0.55     |
| 0.04           | 0.06     | 0.26      | 0.14     | 0.37                            | 1.58     | 0.03                      | 0.42     |
| 0.12           | -0.01    | 0.24      | 0.31     | 0.19                            | 0.34     | 0.04                      | 0.71     |
| -0.01          | 0.13     | 0.13      | 0.33     | 1.15                            | 0.24     | 0.01                      | 1.41     |
| 0.27           | 0.26     | 0.33      | 0.38     | 0.21                            | 0.37     | 0.85                      | 0.93     |
| -0.01          | 0.02     | 0.2       | 0.4      | 0.09                            | 0.62     | 0.02                      | 0.29     |
| 0.11           | 0.26     | 0.26      | 0.27     | 0.56                            | 1.87     | 1.33                      | 0.4      |
| 0.07           | 0.07     | 0.28      | 0.16     | 0.36                            | 0.94     | 0.44                      | 0.35     |
| 0.14           | 0.26     | 0.15      | 0.15     | 0.19                            | 0        | 0.45                      | 0.65     |
| 0.06           | 0.04     | 0.31      | 0.27     | 1.61                            | 0.3      | 0.4                       | 1.44     |
| 0.09           | -0.02    | 0.04      | -0.03    | 0.54                            | 0.07     | 0.19                      | 1.25     |
| 0.02           | 0.09     | 0.14      | 0.41     | 0.57                            | 1.69     | -0.02                     | 0.71     |
| 0.08           | 0.05     | 0.11      | 0.18     | 0.2                             | 0.93     | 0.01                      | 1.03     |
| 0.15           | 0.06     | 0.16      | 0.28     | 0.11                            | 0.59     | 0.44                      | 2.9      |
| 0.05           | -0.21    | 0.2       | 0.15     | 0.1                             | -0.08    | -0.1                      | 0.54     |
| -0.02          | -0.13    | 0.18      | 0.22     | 0.22                            | 0.5      | 0.22                      | 1.55     |
| 0.07           | 0.27     | 0.09      | 0.11     | 0.31                            | 0.35     | 0.1                       | 0.78     |
| 0.04           | 0.02     | 0.17      | 0.34     | 0.13                            | 0.46     | 0.51                      | 0.46     |
| 0.13           | 0.13     | 0.18      | 0.19     | 0.19                            | 0.45     | 0.46                      | 2.2      |
| 0.09           | 0.04     | 0.2       | 0.1      | 0.18                            | 0.12     | 0.16                      | 0.88     |
| 0.2            | 0.21     | 0.22      | 0.09     | 0.16                            | -0.03    | 0.12                      | 1.04     |
| 0              | 0.04     |           |          | 0.02                            | 0.3      | 0.66                      | 0.75     |
| 0.13           | 0.08     |           |          | 0.71                            | 0.45     | 0.08                      | 0.91     |
| -0.02          | 0.11     |           |          | 0.1                             | 0.16     | 0.03                      | 1.64     |
|                |          |           |          | 0.22                            | 0.02     | 0.03                      | 1.13     |
|                |          |           |          | -0.16                           | 0.97     | 0.23                      | 1.96     |
|                |          |           |          | 0.43                            | 1.57     |                           |          |
|                |          |           |          | 0.18                            | 0        |                           |          |
|                |          |           |          | 0.27                            | 0.14     |                           |          |
|                |          |           |          | 0.2                             | 0.88     |                           |          |
|                |          |           |          | 0.31                            | 0.56     |                           |          |
|                |          |           |          | 0.45                            | 0.91     |                           |          |
|                |          |           |          | 0.08                            | 0.43     |                           |          |
|                |          |           |          | 0                               | 0.61     |                           |          |
|                |          |           |          | 0.1                             | 0.58     |                           |          |
|                |          |           |          | 0.21                            | 1.93     |                           |          |
|                |          |           |          | 0.99                            | 0.69     |                           |          |
|                |          |           |          | 0.11                            | 0.01     |                           |          |
|                |          |           |          | 0.32                            | 0.52     |                           |          |
|                |          |           |          | 0.12                            | 0.43     |                           |          |
|                |          |           |          | 0.11                            | 0.58     |                           |          |
|                |          |           |          | 0.2                             | 0.35     |                           |          |
|                |          |           |          | -0.35                           | 0.37     |                           |          |
|                |          |           |          | 0.17                            | 0.28     |                           |          |
|                |          |           |          | 0.4                             | 0.52     |                           |          |
|                |          |           |          | 0.53                            | 0.4      |                           |          |
|                |          |           |          | -0.03                           | 0.12     |                           |          |
|                |          |           |          | 0.2                             | 0.4      |                           |          |
|                |          |           |          | 0.1                             | 0.39     |                           |          |
|                |          |           |          | 0.04                            | 0.62     |                           |          |
|                |          |           |          | 0.07                            | 0.1      |                           |          |

**Table S2. Average aortic root and ascending aortic growth over the 7-week period spanning pregnancy and lactation in treated mice.**

| <i>Fbn1</i> mgR/mgR female, pups removed |          | <i>Fbn1</i> mgR/mgR, lact, OTA |          | <i>Fbn1</i> mgR/mgR, lact, hydral |          | <i>Fbn1</i> mgR/mgR, lact, propran |          | <i>Fbn1</i> mgR/mgR, lact, trametinib |          |
|------------------------------------------|----------|--------------------------------|----------|-----------------------------------|----------|------------------------------------|----------|---------------------------------------|----------|
| Root (mm)                                | Asc (mm) | Root (mm)                      | Asc (mm) | Root (mm)                         | Asc (mm) | Root (mm)                          | Asc (mm) | Root (mm)                             | Asc (mm) |
| 0.02                                     | 1.11     | 0.16                           | -0.02    | 0.09                              | 0.44     | 0.71                               | 1.05     | 0.06                                  | 0.35     |
| 0.12                                     | 0.07     | 0.54                           | 1.01     | 0.02                              | 0.45     | 0.12                               | 0.12     | 0.11                                  | 0.08     |
| 0.14                                     | 0.34     | 0.25                           | 1.47     | 0.02                              | 0.38     | 0.35                               | 0.21     | -0.09                                 | 0.2      |
| 0.22                                     | 0.68     | 0.19                           | 0.3      | 0.33                              | 0.62     | 0.17                               | 2        | 0.16                                  | 0.84     |
| 0.23                                     | 1.31     | 0.75                           | 1.07     | -0.07                             | 0.37     | 0.16                               | 0.63     | 0.17                                  | 0.99     |
| 0.09                                     | 0.81     | 0.19                           | -0.07    | 0.16                              | 0.35     | 0.02                               | 2.11     | 0.05                                  | 1.33     |
| 0.11                                     | 0.26     | 0.21                           | 0.77     | 0.9                               | 0.38     | 0.16                               | 0.82     | 0.03                                  | -0.09    |
| 0.18                                     | 0.66     | 0.46                           | 0.38     | 0.6                               | 0.77     |                                    |          | 0.03                                  | 1.37     |
| 0.29                                     | 0.4      | 0.42                           | -0.05    | 0.11                              | 0.3      |                                    |          | 0.3                                   | 2.07     |
| 0.01                                     | 0.54     | 0.2                            | 0.64     | 0.29                              | 0.48     |                                    |          | 0                                     | 0.53     |
| 0.15                                     | 0.12     | 0.23                           | 0.19     | 0.41                              | 0.41     |                                    |          | 0.06                                  | 1.03     |
| 0.02                                     | 0.54     | 0.18                           | 0.28     | 0.66                              | 0.69     |                                    |          | 0.2                                   | 0.57     |
| 0.07                                     | 0.05     | 0.18                           | -0.28    | 0.1                               | 0.83     |                                    |          | 0.16                                  | 0.56     |
| 0.13                                     | 0.12     | 0.14                           | 0.64     | 0.09                              | 0.39     |                                    |          | 0.09                                  | 0.92     |
| -0.09                                    | 0.55     | 0.67                           | 0.3      | -0.05                             | 1.07     |                                    |          | -0.04                                 | -0.22    |
| 0.09                                     | 0.72     |                                |          | 0.15                              | 0.65     |                                    |          | 0.19                                  | 0.41     |
| 0.27                                     | 0.63     |                                |          | 0.17                              | 0.43     |                                    |          | 0.11                                  | -0.04    |
| -0.03                                    | 0.07     |                                |          | 0.02                              | 0.42     |                                    |          | 0                                     | 0.49     |
| 0.11                                     | 0.2      |                                |          | 0.03                              | 0.27     |                                    |          | 0.2                                   | 0.56     |
| 0.91                                     | 1.53     |                                |          | 0                                 | 1.09     |                                    |          | 0.27                                  | 0.39     |
|                                          |          |                                |          | -0.28                             | 0.42     |                                    |          | 0.13                                  | 0.99     |
|                                          |          |                                |          | 0.19                              | 1.18     |                                    |          | 1.16                                  | 1.39     |
|                                          |          |                                |          | 1.03                              | 0.47     |                                    |          | 0.13                                  | 0.19     |
|                                          |          |                                |          | 0.03                              | 1.19     |                                    |          | 0.28                                  | 0.65     |
|                                          |          |                                |          | 0.45                              | 0.61     |                                    |          | 0.74                                  | 0.14     |
|                                          |          |                                |          | 0.01                              | 0.43     |                                    |          |                                       |          |
|                                          |          |                                |          | 0.9                               | 1.01     |                                    |          |                                       |          |
|                                          |          |                                |          | 0.21                              | 0.31     |                                    |          |                                       |          |

**Table S3. Effect of OTA treatment on the average systolic and diastolic blood pressure.**

| <i>Fbn1</i> mgR/mgR, never preg |                  | <i>Fbn1</i> mgR/mgR, lact |                  | <i>Fbn1</i> mgR/mgR, lact, OTA |                  |
|---------------------------------|------------------|---------------------------|------------------|--------------------------------|------------------|
| systolic (mmHg)                 | diastolic (mmHg) | systolic (mmHg)           | diastolic (mmHg) | systolic (mmHg)                | diastolic (mmHg) |
| 121                             | 98               | 129                       | 98               | 143                            | 116              |
| 137                             | 102              | 134                       | 104              | 137                            | 118              |
| 124                             | 102              | 113                       | 90               | 149                            | 106              |
| 155                             | 110              | 152                       | 126              | 143                            | 114              |
| 109                             | 85               |                           |                  | 133                            | 106              |

**Table S4. Average OR expression in the aorta.**

| never pregnant |                     | lactating |                     |
|----------------|---------------------|-----------|---------------------|
| WT             | <i>Fbn1</i> mgR/mgR | WT        | <i>Fbn1</i> mgR/mgR |
| 0.2410558      | 1.541924            | 2.331098  | 1.536699            |
| 1.931625       | 1.059976            | 4.127545  | 1.052347            |
| 1.237286       | 0.5630537           | 1.884531  | 6.026768            |
| 0.6667373      | 1.709378            | 2.683533  | 1.437247            |
| 0.9232956      | 0.9931157           | 1.158455  | 1.823745            |
|                |                     | 1.241769  | 3.053058            |

**Table S5. Effect of hydralazine or propranolol on the average systolic and diastolic blood pressure.**

| <i>Fbn1mgR/mgR</i> , never preg |                  | <i>Fbn1mgR/mgR</i> , lact |                  | <i>Fbn1mgR/mgR</i> , lact, hydral |                  | <i>Fbn1mgR/mgR</i> , lact, propran |                  |
|---------------------------------|------------------|---------------------------|------------------|-----------------------------------|------------------|------------------------------------|------------------|
| systolic (mmHg)                 | diastolic (mmHg) | systolic (mmHg)           | diastolic (mmHg) | systolic (mmHg)                   | diastolic (mmHg) | systolic (mmHg)                    | diastolic (mmHg) |
| 132                             | 90               | 131                       | 68               | 104                               | 58               | 109                                | 54               |
| 128                             | 98               | 141                       | 82               | 104                               | 48               | 112                                | 58               |
| 141                             | 101              | 120                       | 72               | 111                               | 51               | 118                                | 60               |
| 129                             | 100              | 121                       | 61               | 104                               | 59               | 99                                 | 42               |

**Table S6. Average ERK1/2 phosphorylation in untreated mice.**

| WT             |             | <i>Fbn1mgR/mgR</i> |             |
|----------------|-------------|--------------------|-------------|
| never pregnant | lactating   | never pregnant     | lactating   |
| 0.199507389    | 0.429927415 | 0.968475452        | 1.016613076 |
| 0.45625367     | 0.548196015 | 0.532402792        | 1.203883495 |
| 0.336553945    | 0.298314607 | 0.446769231        | 1.839694656 |
| 0.456663055    | 0.39197995  | 0.771397616        | 2.050344828 |

**Table S7. Average ERK1/2 phosphorylation in treated mice.**

| WT             |            | <i>Fbn1mgR/mgR</i> |            |              |            |             |  |
|----------------|------------|--------------------|------------|--------------|------------|-------------|--|
| never pregnant | lactating  | never pregnant     | lactating  | pups removed | OTA        | hydralazine |  |
| 3.14908662     | 5.48640916 | 6.20333988         | 7.68521739 | 4.20368194   | 8.52375052 | 6.64315669  |  |
| 2.70076816     | 5.9640678  | 6.99820144         | 9.25362845 | 6.05139186   | 5.45016251 | 6.22814983  |  |
| 2.34533228     | 5.7009702  | 9.64836224         | 13.0657895 | 5.50969779   | 8.000819   | 4.63847145  |  |
|                |            | 4.29026549         | 9.93471954 |              |            |             |  |

**Table S8. Effect of trametinib on average systolic and diastolic blood pressure.**

| <i>Fbn1mgR/mgR</i> , lact |                  | <i>Fbn1mgR/mgR</i> , lact, trametinib |                  |
|---------------------------|------------------|---------------------------------------|------------------|
| systolic (mmHg)           | diastolic (mmHg) | systolic (mmHg)                       | diastolic (mmHg) |
| 131                       | 72               | 136                                   | 82               |
| 129                       | 68               | 134                                   | 84               |
| 146                       | 96               | 146                                   | 90               |
| 133                       | 88               | 128                                   | 79               |
| 142                       | 90               | 142                                   | 81               |
| 126                       | 77               | 144                                   | 84               |
| 129                       | 74               | 138                                   | 78               |
| 134                       | 80               | 147                                   | 94               |

**Table S9. Average ERK1/2 phosphorylation in trametinib-treated mice.**

| <i>Fbn1mgR/mgR</i> |                  |
|--------------------|------------------|
| lactating          | lact, trametinib |
| 0.287155147        | 0.064662951      |
| 0.426111334        | 0.106531049      |
| 0.449943757        | 0.051665862      |
| 0.611052072        | 0.041792853      |
| 0.828813559        | -0.016420361     |
| 0.411355736        |                  |
